# Supplementary material for: Construction of nanorod-shaped TiO2/Cu3N p–n heterojunction for efficient visible-light hydrogen evolution
Source: Royal Society of Chemistry journal article supplement (doi:10.1039/d4tc00916a), 2024-01-01
Supplement: d4tc00916a1.pdf [file d4tc00916a1.pdf]

*Supporting Information for*

## **Construction of nanorod-shaped TiO<sub>2</sub>/Cu<sub>3</sub>N p-n heterojunction for efficient visible-light hydrogen evolution**

Zhengwang Cheng<sup>a</sup>, Neng Gan<sup>a</sup>, Gang Yuan<sup>b</sup>, Aobo Wang<sup>a</sup>, Jiyan Liu<sup>c</sup>, Hui Lv<sup>a</sup>, Changcun Han<sup>a</sup>,  
Mei Wang<sup>a</sup>, Mengdai Luoshan<sup>a</sup>, Xinguo Ma<sup>a</sup>, Wei Zou<sup>a,\*</sup>

<sup>a</sup> *School of Science, Hubei University of Technology, Wuhan 430068, China*

<sup>b</sup> *School of Materials Science and Engineering, Central South University, Changsha 410083,  
China*

<sup>c</sup> *Key Laboratory of Optoelectronic Chemical Materials and Devices of Ministry of Education,  
Jiangnan University, Wuhan 430056, China*

\*Corresponding author. E-mail: weizou@hbut.edu.cn (W. Zou)

### **1. Experimental details**

#### *1.1 Synthesis of rutile TiO<sub>2</sub> nanorods (NRs)*

Rutile TiO<sub>2</sub> nanorods were synthesized on fluorine-doped tin oxide (FTO) glass substrates through a hydrothermal method.<sup>1-3</sup> Initially, 10 mL of concentrated hydrochloric acid (37 wt%) was diluted with 20 mL of deionized water. Subsequently, 0.3 mL of tetrabutyl orthotitanate (TBOT) was added to the aforementioned hydrochloric acid dilution and stirred magnetically for 30 minutes. Next, the solution was divided into six parts and transferred into six 25 mL Teflon-lined stainless-steel autoclaves. Each autoclave contained a piece of FTO substrate with the conductive surface facing downward. Subsequently, the system was placed in a drying oven at 180°C for 21 hours. Following natural cooling, the obtained films were sequentially rinsed with anhydrous ethanol and deionized water, and then dried in air at 60°C for 30 minutes. At last, the films were annealed in a muffle furnace under air at 500 °C for 1 hour, with a temperature increase rate of 2 °C/min.

#### *1.2 Deposition of Cu<sub>3</sub>N film*

The Cu<sub>3</sub>N films were deposited onto bare FTO through the reactive direct-current (DC) magnetron sputtering (MS) method,<sup>4</sup> with the pure copper target (99.9%

purity, diameter  $\Phi$  60 mm  $\times$  thickness t 4 mm; purchased from Prmat (Shanghai) Technology Co., Ltd.) used as the sputtering source. The substrates were mounted onto a sample holder, which was capable of being heated to  $< 500$  °C through thermal radiation and kept rotating during the deposition process. After sample insertion, the background vacuum of the MS system (PD-500, Wuhan PDVACUUM Technologies Co., Ltd) was evacuated to be better than  $7.5 \times 10^{-4}$  Pa.<sup>5</sup> Then, the substrate underwent an additional degassing, and the target was pre-sputtered for 10 min to remove the surface contaminant. Finally, Cu<sub>3</sub>N was deposited onto FTO at a substrate temperature of 80 °C and a gas flow ratio of Ar<sub>2</sub>:N<sub>2</sub>=5:1 for a duration time of 10 s.

### *1.3 Construction of TiO<sub>2</sub>/Cu<sub>3</sub>N heterojunction*

After the synthesis of rutile TiO<sub>2</sub> NRs array on FTO substrate, the sample was transferred to the MS system through a vacuumed container. Then, the Cu<sub>3</sub>N film was deposited onto the TiO<sub>2</sub>-coated substrate following the above procedure, except for the difference of substrate.

### *1.4 Characterization*

The crystal phase was investigated through grazing incidence X-ray diffraction (GIXRD), using a Phillips X'Pert Panalytical diffractometer, operated at 40 mA and 45 kV, employing monochromated Cu K $\alpha$ <sub>1</sub> radiation (incident angle = 3°,  $\lambda$  = 1.54056 Å, scan rate = 10°/min). The interface structure and interplanar distance were characterized by transmission electron microscopy (TEM, FEI Talos F200s). The elemental composition and chemical valence state were analyzed using X-ray photoelectron spectroscopy (XPS, ThermoFisher ESCALAB Xi+) with monochromatized Al K $\alpha$  radiation (1486.8 eV). The surface/interface morphology and elemental distribution of the specimens were examined through scanning electron microscopy (SEM, JEOL JSM-7800F) and energy-dispersive spectroscopy (EDS).

UV-Vis diffuse reflectance spectroscopy (DRS) was performed on a double-beam spectrophotometer (UH4150, Hitachi). The photoluminescence spectra (PL) were recorded using a steady-state transient fluorescence spectrometer (OmniFluo900, Zolix), excited by 300 nm UV light. Time-resolved photoluminescence (TRPL)

spectra were measured on a fluorescence spectrophotometer (FLS1000, Edinburgh Instruments), with excitation and emission wavelength of 300 nm and 410 nm, respectively. Surface photovoltage (SPV) was measured using a surface photovoltage spectrometer (PL-SPS/IPCE1000), which was composited with a sample chamber, a monochromatic light source, and a phase-locked amplifier (SR830) with a chopper (SR540). The valence band maximum (VBM) of TiO<sub>2</sub> and Cu<sub>3</sub>N was estimated by ultraviolet photoelectron spectroscopy (UPS, ThermoFischer, ESCALAB Xi+). All characterizations were carried out at room temperature.

### *1.5 Photoelectrochemical performance test*

Electrochemical testing was performed using an electrochemical analyzer (CHI660E) with a standard three-electrode system. The working, counter and reference electrodes were sample, platinum sheet, and Ag/AgCl electrodes, respectively. The electrolyte was 0.1M Na<sub>2</sub>SO<sub>4</sub> solution (pH=7) and the effective area of the sample was about 2.5 cm<sup>2</sup>. The electrochemical impedance spectra (EIS) were gained using a 10 mV AC voltage amplitude. The Mott-Schottky (MS) curves were obtained at frequency of 1000 Hz, amplitude of 5 mV, and quiet time of 2 s. A 500 W xenon lamp and UV-420 filter were used with incident light output wavelength > 420 nm, and the incident light intensity was 100 mW/cm<sup>2</sup>. A solar simulator provides illumination with AM 1.5G filter. A LabSolar II photocatalytic hydrogen evolution system (Labsolar-6A, Beijing Perfectlight) and a gas chromatograph were used to measure the evolution of hydrogen under illumination. The potential was converted to a reversible hydrogen electrode (RHE) based on the equation:  $E_{\text{RHE}} = E_{\text{Ag/AgCl}} + 0.059 \times \text{pH} + 0.196$ .

## 2. Supplemental figures

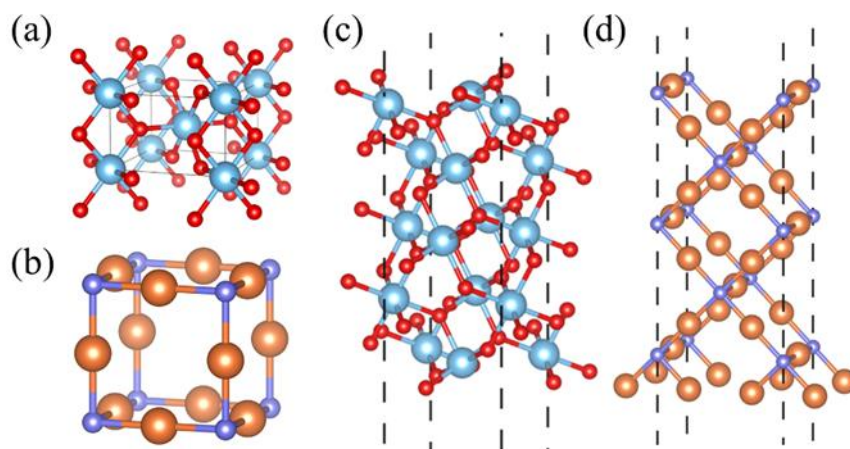

**Fig. S1** The atomic structures of (a)  $\text{TiO}_2$ , (b)  $\text{Cu}_3\text{N}$ , (c)  $\text{TiO}_2$  (101) slab and (d)  $\text{Cu}_3\text{N}$  (110) slab.

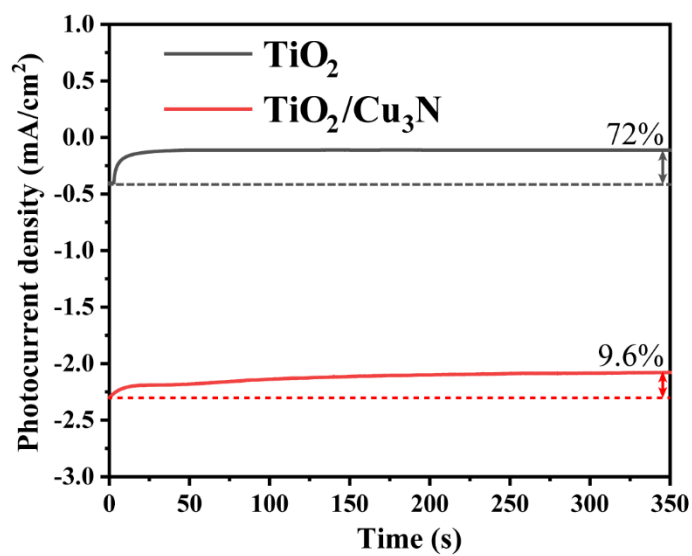

**Fig. S2** The photocurrent response by time of  $\text{TiO}_2$  and  $\text{TiO}_2/\text{Cu}_3\text{N}$  heterojunction.

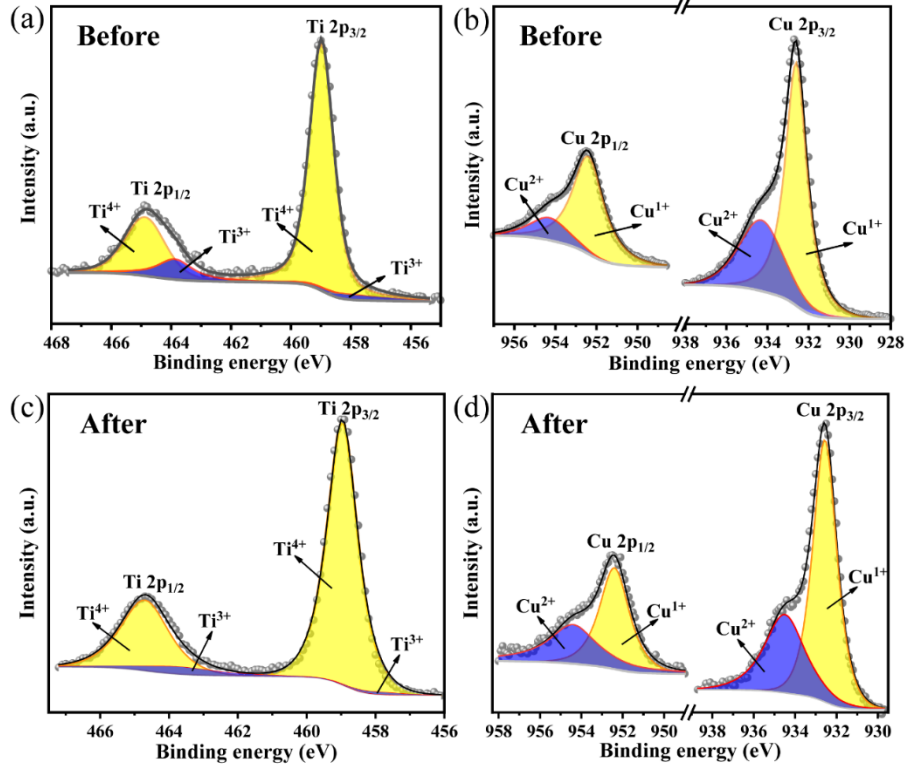

**Fig. S3** XPS results of Ti 2p and Cu 2p before and after PEC hydrogen evolution of 8 cycles.

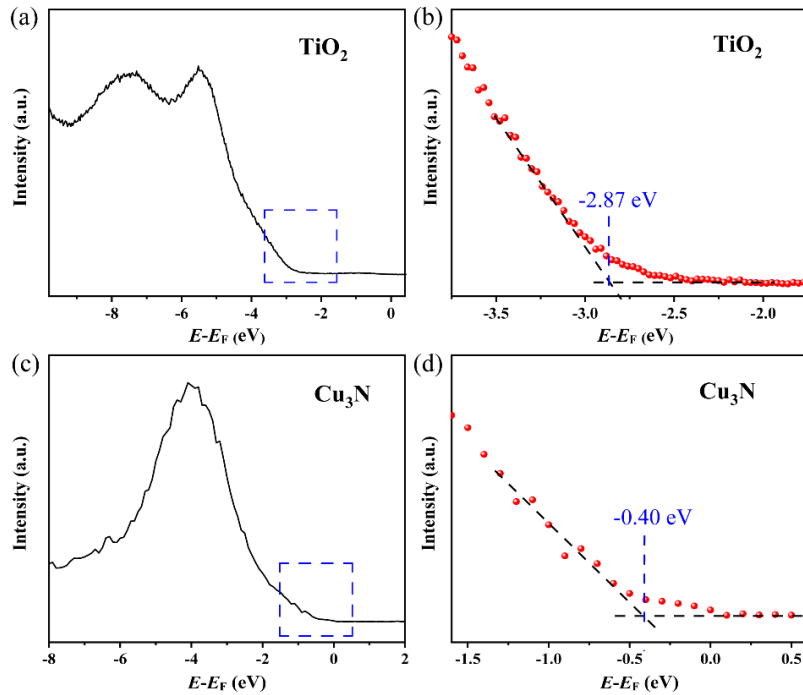

**Fig. S4** UPS spectra measured by He I $\alpha$  ( $h\nu = 21.218$  eV). (a, c) and (b, d) are the valence band and valence band maximum ( $E_{VBM} = E_V - E_F$ ) of TiO<sub>2</sub> and Cu<sub>3</sub>N with referring to the Fermi level ( $E_F$ ), respectively.

**Table S1.** Fitted PL decay parameters of TiO<sub>2</sub> and TiO<sub>2</sub>/Cu<sub>3</sub>N.

|                                     | $\tau_1$ , ns | $\tau_2$ , ns | $\tau_3$ , ns | $A_1$   | $A_2$  | $A_3$ | $\tau_{ave}$ , ns |
|-------------------------------------|---------------|---------------|---------------|---------|--------|-------|-------------------|
| TiO <sub>2</sub>                    | 0.727         | 3.319         | 30.000        | 3821.35 | 252.49 | 32.59 | 7.43              |
| TiO <sub>2</sub> /Cu <sub>3</sub> N | 0.545         | 3.356         | 43.384        | 3751.38 | 367.72 | 85.22 | 23.74             |

**Table S2.** The summarized percentage of +4/+3 states in Ti 2p and +2/+1 states in Cu 2p, which were obtained by fitting the XPS results of Ti 2p and Cu 2p before and after PEC hydrogen evolution in Fig. S3.

|        | Ti <sup>4+</sup> | Ti <sup>3+</sup> | Cu <sup>2+</sup> | Cu <sup>+</sup> |
|--------|------------------|------------------|------------------|-----------------|
| Before | 89.61%           | 10.39%           | 29.24%           | 70.76%          |
| After  | 92.73%           | 7.27%            | 37.76%           | 62.24%          |

**Table S3.** Band gap ( $E_g$ ), positions of the conduction and valence bands of TiO<sub>2</sub> and Cu<sub>3</sub>N refer to the Fermi level  $E_F$ , *i. e.*  $E_C-E_F$  and  $E_V-E_F$ .

|                   | $E_g$ (eV) | $E_V-E_F$ (eV) | $E_C-E_F$ (eV) |
|-------------------|------------|----------------|----------------|
| TiO <sub>2</sub>  | 3.09       | -2.87          | 0.22           |
| Cu <sub>3</sub> N | 1.69       | -0.40          | 1.29           |

**Supplemental references:**

- 1 Z. Cheng, Z. Hu, Z. Liu, C. Han, M. Wang, J. He, W. Zou, X. Ma, Non-noble plasmonic MoO<sub>2</sub> as photosensitizer of 1D TiO<sub>2</sub> nanorods for enhancing visible-light photoelectrochemical performance, *Surf. Interfaces*, 2022, **31**, 102082, <https://doi.org/10.1016/j.surfin.2022.102082>.
- 2 Z. Cheng, Z. Hu, X. Ma, M. Wang, N. Gan, M. Pan, Enhancing the visible light photoelectrochemical water splitting of TiO<sub>2</sub> photoanode *via* a p–n Heterojunction and the plasmonic effect, *J. Phys. Chem. C*, 2022, **126**, 11510-11517,

<https://doi.org/10.1021/acs.jpcc.2c02798>.

- 3 Z. Hu, Z. Cheng, N. Gan, Z. Liu, C. Han, M. Wang, A. Wang, J. He, W. Zou, X. Ma, Enhancing the photoelectrochemical performance of TiO<sub>2</sub> through decorating a topological insulator Bi<sub>2</sub>Te<sub>3</sub> film and non-noble plasmonic Cu nanoparticles, *J. Phys. Chem. C*, 2022, **126**, 19047-19055, <https://doi.org/10.1021/acs.jpcc.2c05394>.
- 4 M. Zervos, A. Othonos, M. Sergides, T. Pavloudis, J. Kioseoglou, Observation of the direct energy band gaps of defect-tolerant Cu<sub>3</sub>N by ultrafast pump-probe spectroscopy, *J. Phys. Chem. C*, 2020, **124**, 3459-3469, <https://doi.org/10.1021/acs.jpcc.9b10303>.
- 5 Z. Cheng, A. Wang, H. Bo, M. Wang, J. He, W. Zou, X. Ma, Preparation and structural investigation of ultra-uniform Mo films on a Si/SiO<sub>2</sub> wafer by the direct-current magnetron sputtering method, *Cryst. Growth Des.*, 2023, **23**, 1014-1022, <https://doi.org/10.1021/acs.cgd.2c01188>.
